# Supplementary material for: LEAFY maintains apical stem cell activity during shoot development in the fern Ceratopteris richardii
Source: eLife. 2018 Oct 24;7:e39625. doi: 10.7554/eLife.39625 (PMC6200394; doi:10.7554/eLife.39625)
Supplement: Supplementary file 8. — All citations included in reference list of main article (Bradley et al., 1996; Blázquez et al., 1997; Bradley et al., 1997; Kyozuka et al., 1998; Pnueli et al., 1998; Ratcliffe et al., 1999; Gourlay et al., 2000; Bomblies et al., 2003; Becker et al., 2005; Meng et al., 2007; Souer et al., 2008; Wreath et al., 2013). [file elife-39625-supp8.xlsx]

## Sheet: LFY expression-function
Supplementary File 8. Summary of published reports of LFY function in a range of angiosperm species. All citations included in reference list of main article.
Species	Inflorescence type	LFY homolog(s)	Expression analysis methodology	Endogenous expression pattern	Functional analysis methodology	Loss-of-function/knockdown phenotypes reported	Overexpression phenotypes reported	Citations
Arabidopsis thaliana (Arabidopsis)	Raceme	LEAFY (LFY)	In situ localization; AtLFYpro::GUS (Most reports from Col-0 and Ler ecotypes)	Vegetative: Not expressed in SAM; weak expression in vegetative-phase leaf primordia and increasing towards flowering. Expression in developing leaf primordia becomes confined to basal margin then declines entirely. An AtLFYpro::GUS-based study in the Nossen ecotype identified LFY expression in the juvenile SAM (5 day seedlings) under non-inductive photoperiod. Expression in axillary buds not rep…	Knockout: Loss-of-function mutant (lfy). Overexpression: 35Spro::LFY.	Vegetative: Reduced formation of axillary meristems in conjunction with the pny/pfy background. Reproductive: Flowering delayed. Early flowers converted to inflorescences subtended by bracts/cauline leaves. Later flowers exhibit conversion from whorled to spiral phyllotaxy and loss of floral organ identity.	Vegetative: Initiation and outgrowth of axillary buds accelerated. Reproductive: Under inductive photoperiods flowering accelerated temporally but not developmentally (ie. leaf number); under non-inductive photoperiods flowering accelerated both temporally and developmentally. Inflorescences converted to terminal flowers	Expression: Weigel et al. 1992; Blazquez et al. 1997; Bradley et al. 1997; Ratcliffe et al. 1999. Function: Weigel et al. 1992; Weigel & Nilsson 1995; Kanrar et al. 2008; Chahtane et al. 2013.
Antirrhinum majus (Snapdragon)	Raceme	FLORICAULA (FLO)	In situ localization	Vegatative: Not expressed in SAM or leaf primordia. Reproductive: Not expressed in IM. Expressed in FM periphery and the margins and adaxial side of surrounding bracts. Expressed in sepal, petal and carpel primordia, with expression strongest in adaxial tissues. Not detected in stamen primordia.	Knockout: Loss-of-function mutant (flo). Overexpression: Not reported.	Vegetative: No phenotypic effect reported. Reproductive: Flowering time not affected under inductive conditions but delayed or more gradual under non-inductive conditions. Axillary flowers replaced by indeterminate shoots but surrounding bracts still develop.	Not reported	Expression: Coen et al. 1990; Bradley et al. 1996. Function: Carpenter and Coen 1990.
Petunia hybrida (Petunia)	Cyme	ABERRANT LEAF AND FLOWER (AFL)	In situ localization	Vegetative: Expressed in SAM peripheral zone, present in a ring a few cells deep. Expressed in young leaf primordia, lost quickly. Reproductive: Not expressed in IM. Expressed in incipient FM and later FM flanks coincident with initiating floral organ primordia. Expressed in all developing floral organ primordia.	Knockout: Loss-of-function mutant (alf). Overexpression: 35Spro::ALF.	Vegetative: No phenotypic effects detected. Reproductive: No change in flowering time reported, but early flowering driven by 35Spro::UFO is lost in the alf background. Flowers replaced by inflorescence branches.	Vegetative: No effect reported. Reproductive: No acceleration of flowering. Inflorescence and floral development not affected.	Expression: Souer et al. 1998. Function: Souer et al. 1998; Souer et al. 2008.
Nicotiana tabacum (Tobacco)	Cyme	NICOTIANA FLO/LFY 1 (NFL1); NFL2	In situ localization (combined NFL1 and NFL2)	Vegetative: Expressed in SAM (non-inductive photoperiod) and vegetative axillary meristems; present in peripheral zone in a ring of 3 cell layers. Expression pattern not altered by flowering inductive photoperiod. Expressed in stem provascular bundles. Expressed in young leaf primordia (margins and adaxial layer). Reproductive (immature terminal flower only): Expressed in floral meristem margin o…	Knockdown: Co-suppression of NFL1 and NFL2. Overexpression: 35Spro::NFL.	Vegetative: Loss or late emergence of the vegetative SAM (fused cotyledons at germination). Any SAMs produced demonstrated loss of phyllotaxy, with simultaneous initiation of multiple leaf primordia. Frequent bifurcation of the SAM. Reproductive: Flowering very rare. Floral morphology not reported, but fertile transgenic seed produced.	Vegetative: No effect reported. Reproductive: No acceleration of flowering. Inflorescence converted to terminal flower. Flowers produced supernumerary floral organs in all whorls and chimeric floral organ identities (sepaloid petals, petaloid stamens) across whorl boundaries.	Expression: Kelly et al. 1995. Function: Ahearn et al. 2001
Solanum lycopersicum (Tomato)	Cyme/sympodial	FALSIFLORA (FA)	In situ localization	Vegetative: Expressed in SAM (two-leaf juvenile stage onwards) and vegetative axillary (sympodial) meristems; expressed in SAM central and peripheral zones. Expressed in stem provasular bundles. Expressed in leaf primordia and developing leaves (margins and adaxial layers). Reproductive: Expressed in floral meristem (central and peripheral zones), all floral organ primordia and developing floral …	Knockout: Loss-of-function mutant (fa). Overexpression: Not reported	Vegetative: Compound leaves exhibit reduced number of secondary leaflets. Reproductive: Flowering delayed. Floral meristems converted to inflorescences.	Not reported	Expression: Molinero-Rosales et al. 1999; Pnueli et al 1998. Function: Molinero-Rosales et al. 1999
Eschscholzia californica (Californian poppy)	Terminal flower	ESCHSCHOLZIA CALIFORNICA FLORICAULA (EcFLO)	In situ localization	Vegetative: Expressed in SAM peripheral zone from late embryogenesis onwards, 6 cell layers deep but excluded from L1; downregulated in P0 leaf primordia. Expressed in margins and vascular strands of leaf primordia then margins and blastozone of emerging primary leaflets, not detected in secondary leaflets or later leaf development. Reproductive: Expressed in FM periphery and floral organs (sepal…	Knockdown: VIGS. Overexpression: Not reported.	Vegetative: EcFLO expression was reduced to 10% wild-type levels in vegetative meristemss, but no vegetative change detected. Reproductive: Flowering time not delayed but the number of cauline leaves immediately below the terminal flower was reduced. Flowers demonstrate Increased number of floral organ whorls and mosaic floral organ identity.	Not reported	Expression: Busch & Gleissberg 2003; Becker et al. 2005. Knockdown: Wreath et al. 2013.
Cucumis sativus (Cucumber)	Flowers develop in leaf axils	CsLFY	In situ localization	Vegetative: Expressed in vegetative SAM central and peripheral zones. Expressed in leaf primordia. Reproductive: Expressed throughout the FM and in developing floral organs.	Knockdown: RNAi. Overexpression: Not reported.	Vegetative: Early termination of the shoot after the production of 2-4 leaves, associated with downregulation of CsWUS. SAM reported as adopting floral organ fate. Vegetative axillary meristems sometimes continued development. Reproductive: Floral development not affected	Not reported	Expression and Function: Zhao et al. 2017.
Oryza sativa (Rice)	Pannicle	RFL	In situ localization	Vegetative: Not expressed in SAM but expressed in axillary bud primordia and in leaf axils prior to axillary bud formation. Expressed in leaf primordia margins. Reproductive: Expressed in IM and transiently in lateral inflorescence branch primordia, but downregulated in initiating branch apical meristems. Not expressed in spikelet meristem or FM or developing floral organs.	Knockdown: RNAi. Overexpression: Ubipro::RFL.	Vegetative: axillary buds (tillers) not initiated. Reproductive: Flowering delayed or failed. Inflorescence exhibits severely reduced branching due to early termination in spikelets.	Vegetative: No phenotypic changes reported. Reproductive: Flowering accelerated. Inflorescence reported as exhibiting reduced branching.	Expression: Kyozuka et al. 1998; Rao et al. 2008. Function: Rao et al. 2008.
Zea mays (Maize)	Pannicle	Zea FLO/LFY1 (ZFL1); ZFL2	Vegetative: RT-PCR. Reproductive: In situ localization	Vegetative: Expression detected in vegetative shoot tip (apex plus leaf primordia). Reproductive: Expressed in male and female IM flanks coincident with initiating spikelet pair meristems. Expressed in spikelet-pair/branch primordia and developing spikelets (determinate inflorescence branches). Expressed in FM and floral organ primordia	Knockout: Loss-of-function double mutant (zfl1 zfl2). Overexpression: Not reported.	Vegetative: Development unaffected. Reproductive: Floral transition more gradual with vegetative characters remaining in lower inflorescences. Female inflorescences developed secondary ears; male inflorescences exhibited reduced branching. Spikelet initiates florets and FM successfully develops outer floral organs (palea and lemma), but subsequently exhibits disruption to determinacy, whorled phy…	Not reported	Expression and Function: Bomblies et al 2003.
Gerbera hybrida (Gerbera)	Capitulum (terminal compound flower)	GhLFY	In situ localization	Vegetative: Not expressed in SAM or leaf primordia. Reproductive: Expressed throughout the IM. Expressed in incipient FM and later in FM central region. Expressed in involucral bract primordium (adaxial side, then axil) and floral organ primordia.	Knockdown: RNAi. Overexpression: Not reported.	Vegetative: Phenotypic changes not reported. Reproductive: Capitulum (inflorescence) meristem determinacy and spiral phyllotaxy disrupted. Floral organs of inner flowers converted to bract or leaf-like organs. FM initiates secondary FMs instead of floral organs throughout (severe RNAi) or in outer trans flowers only (mild RNAi).	Not reported	Expression and Function: Zhao et al 2016.
Populus trichocarpa (Poplar)	Monoeocious; axillary inflorescences (catkins); reduced flowers (two whorls comprising perianth and male or female organs)	PTLF	In situ localization	Vegetative: Expressed in leaf axils/incipient axillary meristems. Expressed in incipient leaf primordia and very young leaves. Reproductive: Not expressed in IM; expressed in nascent FMs on IM flanks (both male and female plants). Expressed in developing reproductive organs and perianth adaxial rim. Expressed in developing bracts, becoming restricted to primordia margins and tips.	Knockdown: Not reported. Overexpression: 35Spro::PTLF.	Not reported	Vegetative: Increased branching, cup-like leaf morphology. Reproductive: mild acceleration of flowering. Overexpression did not convert IM to FM fate. Effects on floral development not reported.	Expression and Function: Rottmann et al 2000.
Lotus japonicus (legume)	Compound raceme. Primary inflorescence meristem produces secondary IM's, each producing 1-3 FMs	LjLFY	In situ localization	Vegetative: Not expressed in SAM. Expressed in compound leaf primordium. Reproductive: Expression in IM and and secondary IM not reported. Expressed throughout early FM, becoming restricted to FM periphery. Expressed in incipient floral organ primordia (sepals, petals, stamens). Expression remained in petals after initiation.	Knockout: Loss-of-function mutant (proliferating floral meristem). Overexpression: Not reported.	Vegetative: Reduction in number of compound leaf leaflets, loss of petioles. Reproductive: FM develops sepals, then iterates secondary FMs in place of inner floral organs.	Not reported	Expression and Function: Dong et al. 2005.
Pisum sativum (Pea; legume)	Compound raceme	UNIFOLIATA (UNI)	In situ localization	Vegetative: Expression detected in lateral shoot primordia but not SAM. Expressed in compound leaf primordia (P1-P2), becoming restricted to distal adaxial tissues (rachillae and leaflets) in later stages (P4-P5). Reproductive: Expressed in IM. Expressed in FM peripheral zone. Expressed in initiating floral organ primordia and developing floral organs.	Knockout: Loss-of-function mutant (uni). Overexpression: Not reported.	Vegetative: Compound leaves exhibit reduced leaflets (1-3) and loss of rachis and tendrils. Leaf primordia initiates but undergoes premature terminal differentiation. Reproductive: supernumerary flowers arise in axils of whorl 1 floral organs.	Not reported	Expression: Hofer et al. 1997; Gourlay et al. 2000. Function: Hofer et al. 1997; Gourlay et al. 2000.
Glycine max (Soybean; legume)	Flowers develop in leaf axils	GmLFY1; GmLFY2	Semi-quantitative RT-PCR of 'GmLFY' (99% sequence identity with GmLFY2)	Vegetative: Detected in shoot tips, leaves and stems (4 week old seedlings). Reproductive: Detected in inflorescence apices, floral organs (sepals, carpel, minor in petals), developing seed pods and developing seeds	Knockdown: RNAi. Overexpression: Not reported.	Vegetative: Delayed transition from juvenile to adult phyllotaxy. Reduced complexity of first adult (compound) leaf. Reproductive: Flowering time not reported. Flowers demonstrate increased number of whorls of organs, floral organs replaced by leaf-like structures	Not reported	Expression: Meng et al. 2007. Function: Champagne et al. 2007.
Medicago truncatula (legume)	Axillary inflorscence meristems, paired flowers	SINGLE LEAFLET1 (SGL1)	In situ localization; SGL1pro::GUS	Vegetative: Expressed in SAM central and peripheral zones. Expressed in leaf primordia and developing compound leaves (leaflets and rahcis vasculature. Reproductive: Expressed in axillary IM. Expressed in FM periphery and petal primordia.	Knockout: Loss-of-function mutant (sgl1). Overexpression: Not reported.	Vegetative: adult trifoliate leaves reduced to single leaflet, resembling juvenile leaf. Reproductive: Effect on flowering time not reported. Additional FMs initiated per IM. FMs iterate secondary FMs in place of petals and stamens.	Not reported	Expression and Function: Wang et al 2008.
